# Supplementary material for: Maternal insulin resistance multigenerationally impairs synaptic plasticity and memory via gametic mechanisms
Source: PubMed Central journal article supplement (PMC6805915; doi:10.1038/s41467-019-12793-3), 2019-10-22
Supplement: 41467_2019_12793_MOESM1_ESM.pdf [file 41467_2019_12793_MOESM1_ESM.pdf]

## **Supplementary Information**

Maternal insulin resistance multigenerationally impairs synaptic plasticity and memory  
via gametic mechanisms

Fusco et al.

**a**

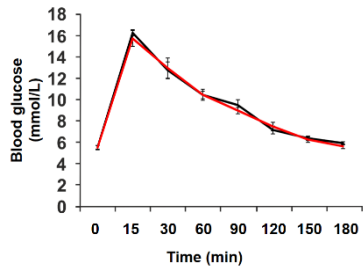

**Supplementary Figure 1. HFD offspring do not show changes in insulin sensitivity. (a)** Blood glucose levels of SD and F1<sub>HFD</sub> mice after intraperitoneal glucose tolerance test (IPGTT) (n = 12 mice from 8 litters per group; statistics by unpaired Student's *t*-test). Data are expressed as mean  $\pm$  SEM.

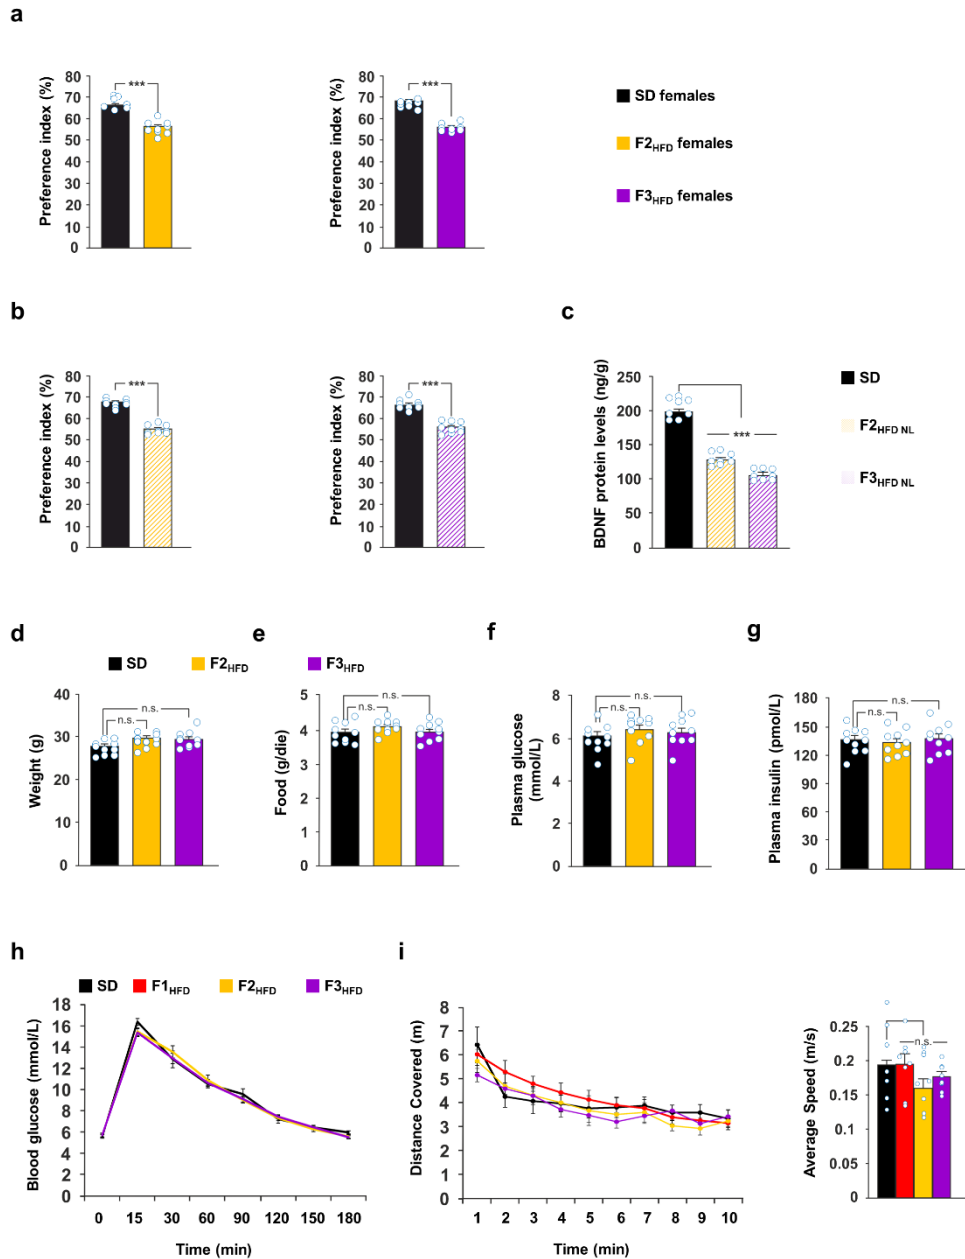

**Supplementary Figure 2. Transgenerational HFD effects are not sex-specific.** (a) Preference index in NOR paradigm for F2<sub>HFD</sub> (left) and F3<sub>HFD</sub> (right) female descendants (n = 9 mice from 6 litters for each group; statistics by unpaired Student's *t*-test). (b) Preference index of F2<sub>HFD</sub> NL (left) and F3<sub>HFD</sub> NL (right) male mice descended from a progenitor fed with HFD from four weeks before mating until delivery (n = 9 mice from 5 litters for each group; statistics by unpaired Student's *t*-test). (c) BDNF levels in the hippocampus of F2<sub>HFD</sub> NL and F3<sub>HFD</sub> NL male mice. ELISA assay was performed in duplicate (n = 8 mice from 6 litters per group; statistics by unpaired Student's *t*-test). (d) Weight, (e) food consumption, (f) fasting glucose plasma levels, (g) fasting insulin plasma levels and (h) IPGTT of SD, F2<sub>HFD</sub> and F3<sub>HFD</sub> mice (n = 12 mice from 8 litters per group; statistics by unpaired Student's *t*-test). (i) Locomotor activity of SD, F1<sub>HFD</sub>, F2<sub>HFD</sub> and F3<sub>HFD</sub> mice quantified by Open Field test (left, n = 10 mice derived from 6 litters for each group; statistics by one-way ANOVA and Bonferroni post hoc) and swimming speed in the 1<sup>st</sup> day of the MWM (right, n = 8 mice derived from 5-6 litters for each group; statistics by one-way ANOVA and Bonferroni post hoc). Data are expressed as mean ± SEM. \*\*\* *p* < 0.001; n.s. not significant.

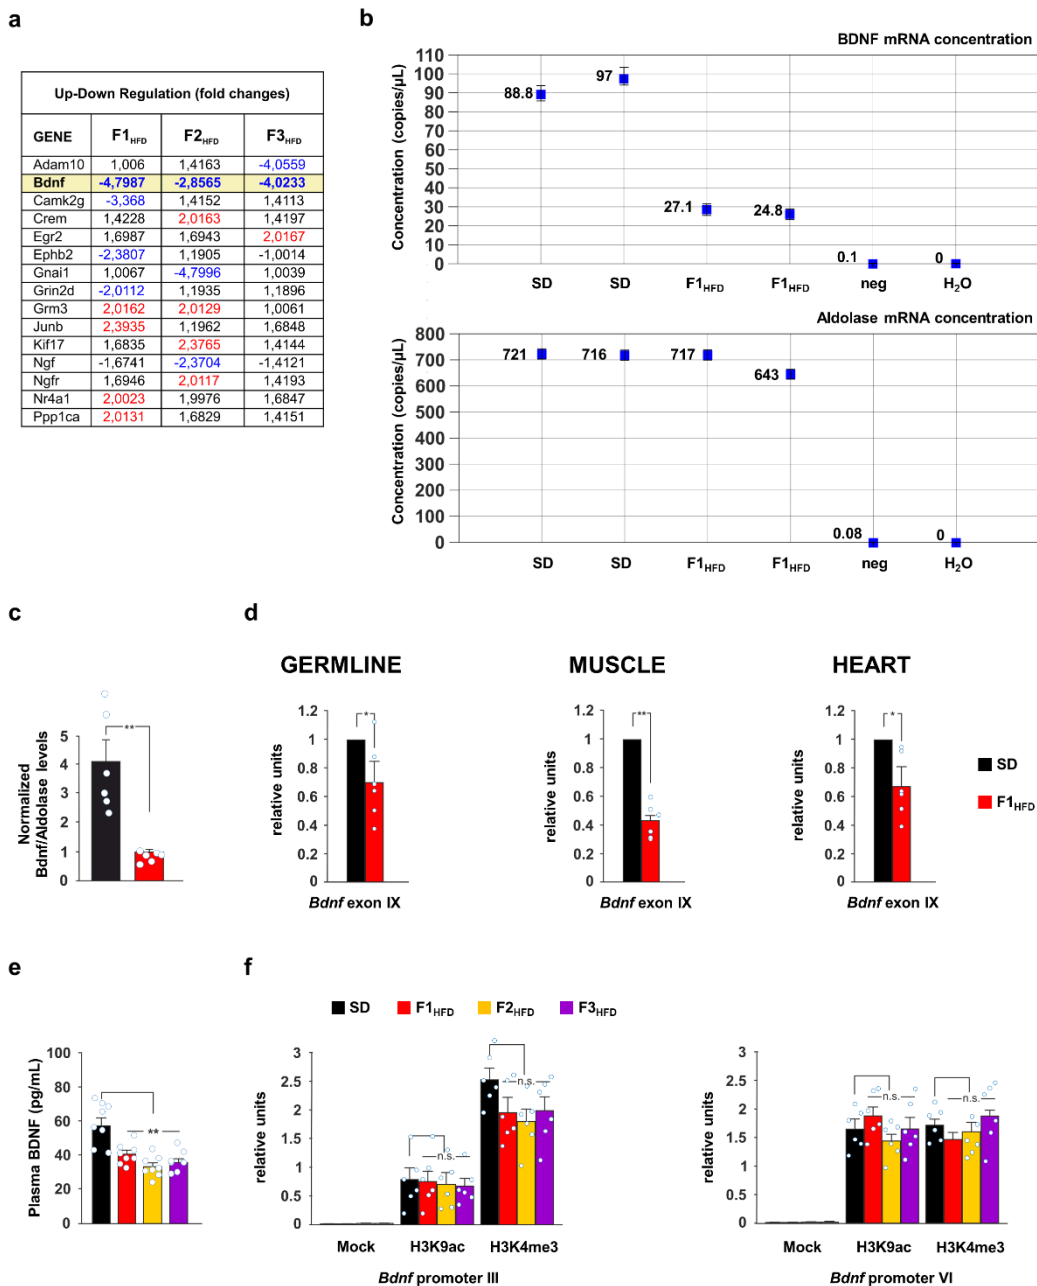

**Supplementary Figure 3. Downregulation of BDNF expression in neurons and other cell types.** (a) Up-down fold expression changes of synaptic plasticity-related genes more markedly affected in the hippocampus of F1<sub>HFD</sub>, F2<sub>HFD</sub> and F3<sub>HFD</sub> mice. (b) Representative *Bdnf* transcript concentration (copies  $\mu\text{L}^{-1}$ ) in CA1 hippocampal neurons of SD and F1<sub>HFD</sub> mice. Aldolase was used as control. (c) ddPCR data were normalized and plotted as mean  $\pm$  SEM ( $n = 6$  neurons from 3 mice of different litters per each group). Each sample was analyzed in duplicate (statistics by unpaired Student's *t*-test). (d) germline, gastrocnemius muscle and heart *Bdnf* coding exon IX expression in SD and F1<sub>HFD</sub> mice ( $n = 6$  mice derived from 4 litters per each group). Gene expression was normalized to actin; experiments were performed in triplicate (statistics by unpaired Student's *t*-test). (e) BDNF plasma levels of SD and HFD descendant male mice measured by ELISA performed in duplicate ( $n = 8$  mice derived from 4 litters per group; statistics by one-way ANOVA and Bonferroni post hoc) (f) ChIP assays of H3K9ac and H3K4me3 on the promoters III and VI of *Bdnf* gene in the hippocampus of SD and HFD descendant male mice. Data represent mean values obtained from 6 mice derived from 5 litters for each group; qPCR experiments were performed in triplicate (statistics by one-way ANOVA and Bonferroni post hoc). Data are expressed as mean  $\pm$  SEM. \*  $p < 0.05$ ; \*\*  $p < 0.01$ ; n.s. not significant.

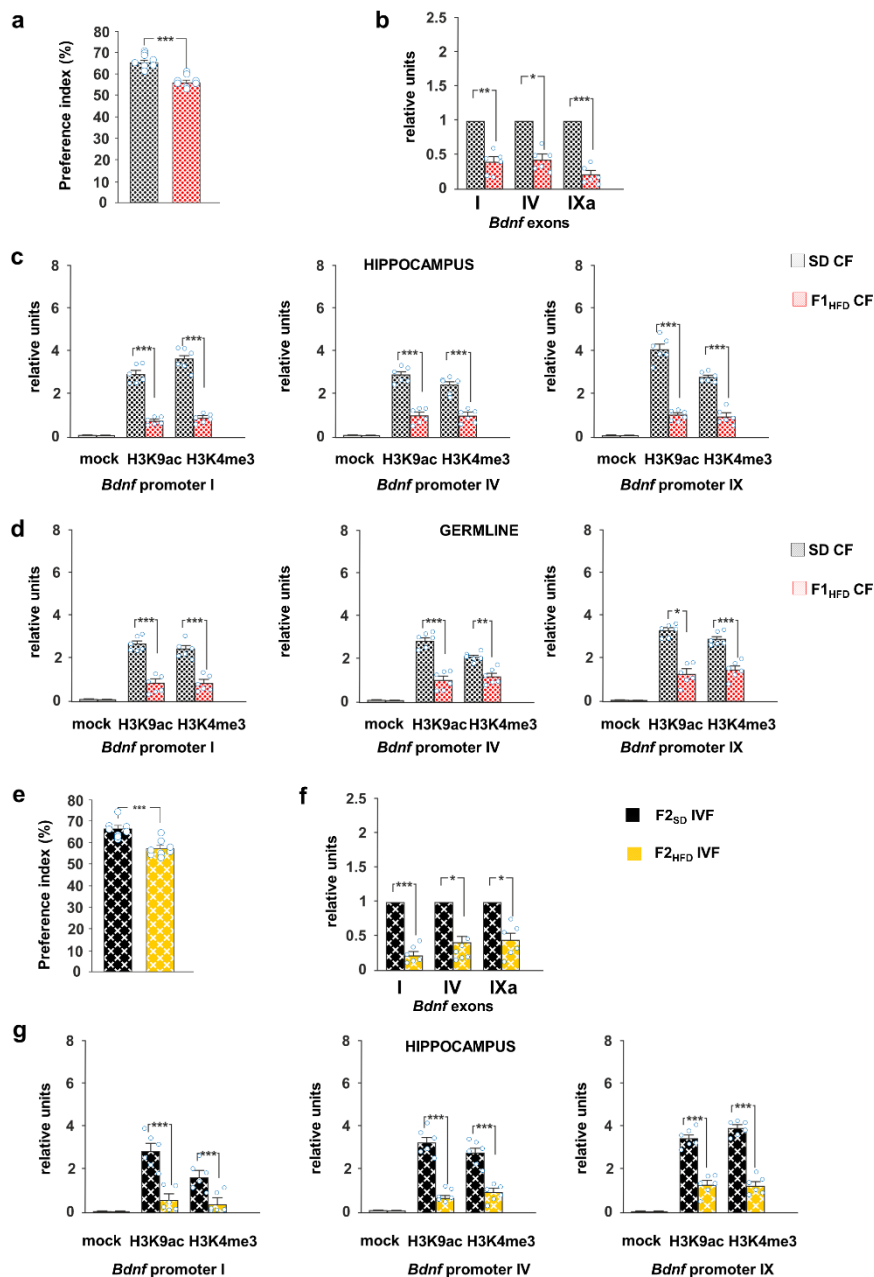

**Supplementary Figure 4. HFD intergenerational effects are not mediated by maternal behavior.** (a) Preference index of SD and F1<sub>HFD</sub> mice fostered by F0 SD-fed females (SD CF and F1<sub>HFD</sub> CF, respectively; n = 9 mice from 6 litters for each group; statistics by unpaired Student's *t*-test). (b) Expression of *Bdnf* exon I, IV and IXa in the hippocampus of SD CF and F1<sub>HFD</sub> CF mice. Data represent mean values obtained from 6 mice derived from 5 litters for each group; experiments were performed in triplicate (statistics by unpaired Student's *t*-test). (c) ChIP assays of H3K9ac and H3K4me3 on the promoters I, IV and IX of *Bdnf* gene in the hippocampus and (d) germline of SD CF and F1<sub>HFD</sub> CF mice. Data represent mean values obtained from 6 mice derived from 4 litters for each group; qPCR experiments were performed in triplicate (statistics by two-way unpaired Student's *t*-test). (e) Preference index of mice born through in vitro fertilization (IVF) of oocytes with sperm of SD or F1<sub>HFD</sub> mice (SD IVF and F1<sub>HFD</sub> IVF, respectively; n = 8 mice from 4 litters for each group; statistics by unpaired Student's *t*-test). (f) Expression of *Bdnf* exon I, IV and IXa in the hippocampus of SD IVF and F1<sub>HFD</sub> IVF animals. Data represent mean values obtained from 6 mice derived from 5 litters for each group; experiments were performed in triplicate (statistics by unpaired Student's *t*-test). (g) ChIP assays of H3K9ac and H3K4me3 on the promoters I, IV and IX of *Bdnf* gene in the hippocampus of SD IVF and F1<sub>HFD</sub> IVF mice. Data represent mean values obtained from 6 mice derived from 4 litters for each group; qPCR experiments were performed in triplicate (statistics by unpaired Student's *t*-test). Data are expressed as mean  $\pm$  SEM. \* *p* < 0.05; \*\* *p* < 0.01; \*\*\* *p* < 0.001.

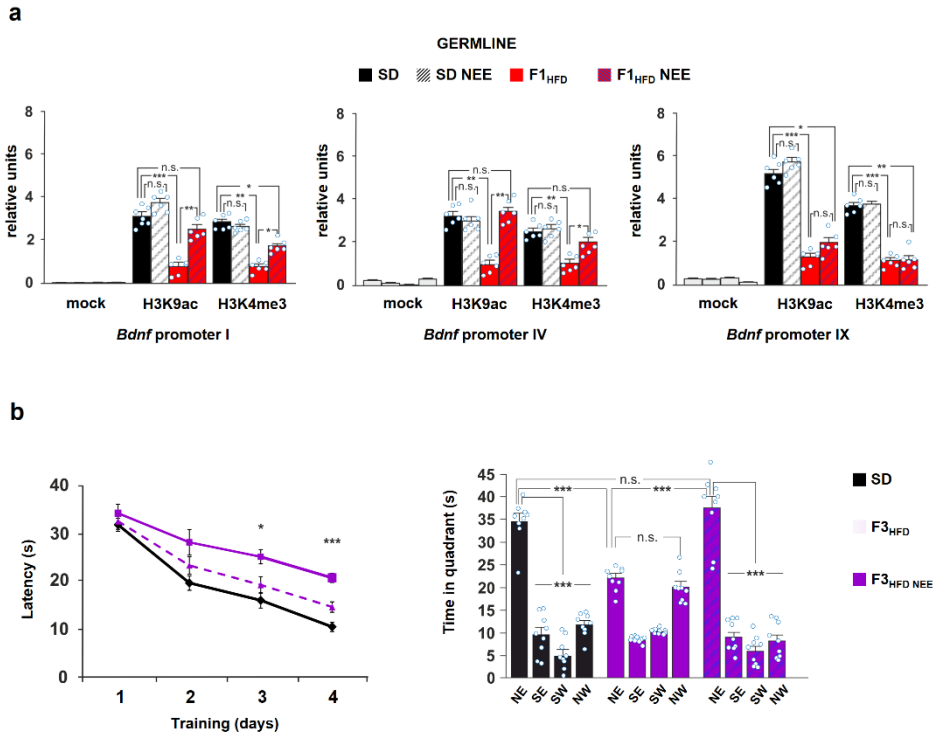

**Supplementary Figure 5. NEE induces transgenerational effects on learning and memory. (a)** ChIP assays of H3K9ac and H3K4me3 on the promoters I, IV and IX of *Bdnf* gene in the germline of SD, SD NEE, F1<sub>HFD</sub> and F1<sub>HFD</sub> NEE male mice. Data represent mean values obtained from 6 mice derived from 4 litters for each group; qPCR experiments were performed in triplicate (statistics by two-way ANOVA and Bonferroni post hoc). **(b)** Latency to reach the hidden platform (left) and time spent in the four quadrants during the probe test (right) in the MWM for SD, F3<sub>HFD</sub> and F3<sub>HFD</sub> NEE male mice (n = 9 mice from 6 litters for each group; statistics by two-way ANOVA and Bonferroni post hoc). For latency, significance is indicated between F3<sub>HFD</sub> and F3<sub>HFD</sub> NEE mice. Data are expressed as mean ± SEM. \*  $p < 0.05$ ; \*\*  $p < 0.01$ ; \*\*\*  $p < 0.001$ ; n.s. not significant.

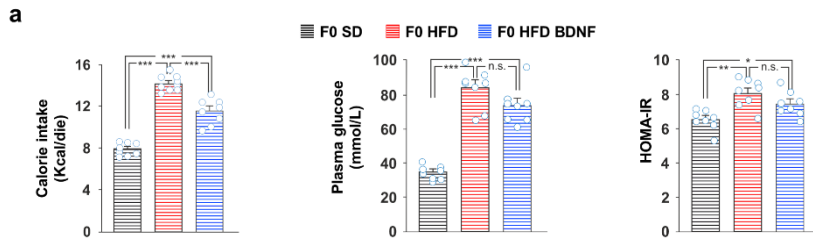

**Supplementary Figure 6. BDNF administration does not revert the maternal insulin resistance. (a)** Calorie intake (Kcal/die), plasma glucose levels and HOMA index of F0 SD, F0 HFD, and F0 HFD BDNF female mice (n = 8 mice per group; statistics by two-way ANOVA and Bonferroni post hoc). Data are expressed as mean ± SEM. \*  $p < 0.05$ ; \*\*  $p < 0.01$ ; \*\*\*  $p < 0.001$ ; n.s. not significant

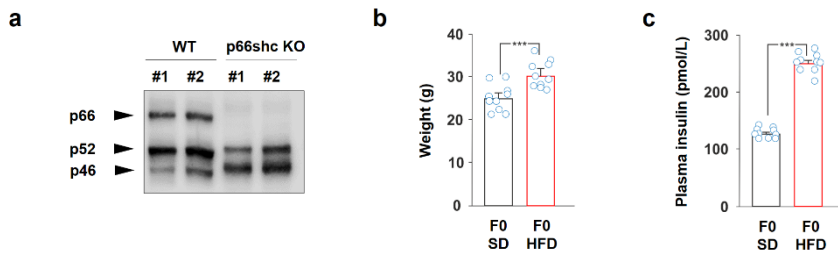

**Supplementary Figure 7. Characterization of p66Shc KO model.** (a) Immunoblot of p66Sch expression in ovaries of wild-type and *p66Shc* KO female mice. (b) Weight and (c) fasting insulin plasma levels of SD-fed (black bar) and HFD-fed (red bar) *p66Shc* KO mothers after four weeks of dietary regimen (n = 10 mice per each group; statistics by unpaired Student's *t*-test). Data are expressed as mean ± SEM. Source data are provided as a Source Data file. \*\*\*  $p < 0.001$



**Supplementary Table 1. GENE REGULATION**

F1, F2, F3 fold changes of genes analyzed in the PCR array (PAMM-126Z).

| Refseq    | Symbol | Description                                                        | F1 fold change | F2 fold change | F3 fold change |
|-----------|--------|--------------------------------------------------------------------|----------------|----------------|----------------|
| NM_007399 | Adam10 | A disintegrin and metallopeptidase domain 10                       | 1,006          | 1,4163         | -4,0559        |
| NM_009622 | Adcy1  | Adenylate cyclase 1                                                | 1,6868         | 1,6814         | 1,6825         |
| NM_009623 | Adcy8  | Adenylate cyclase 8                                                | 1,003          | 1,0036         | 1,1825         |
| NM_009652 | Akt1   | Thymoma viral proto-oncogene 1                                     | 1,6804         | 1,4168         | 1,4115         |
| NM_018790 | Arc    | Activity regulated cytoskeletal-associated protein                 | 1,4193         | 1,4177         | 1,4168         |
| NM_007540 | Bdnf   | Brain derived neurotrophic factor                                  | -4,7987        | -2,8565        | -4,0233        |
| NM_177407 | Camk2a | Calcium/calmodulin-dependent protein kinase II alpha               | -1,4094        | -1,1903        | -1,1864        |
| NM_178597 | Camk2g | Calcium/calmodulin-dependent protein kinase II gamma               | -3,368         | 1,4152         | 1,4113         |
| NM_007664 | Cdh2   | Cadherin 2                                                         | 1,6969         | 1,1964         | 1,1913         |
| NM_009883 | Cebpb  | CCAAT/enhancer binding protein (C/EBP), beta                       | 1,0037         | 1,0031         | 1,1918         |
| NM_007679 | Cebpd  | CCAAT/enhancer binding protein (C/EBP), delta                      | 1,0008         | -1,9898        | 1,0023         |
| NM_007726 | Cnr1   | Cannabinoid receptor 1 (brain)                                     | 1,1986         | 1,004          | -1,1889        |
| NM_133828 | Creb1  | CAMP responsive element binding protein 1                          | 1,001          | -1,001         | -1,001         |
| NM_013498 | Creml  | CAMP responsive element modulator                                  | 1,4228         | 2,0163         | 1,4197         |
| NM_007864 | Dlg4   | Discs, large homolog 4 (Drosophila)                                | 1,0068         | 1,1908         | 1,0055         |
| NM_007913 | Egr1   | Early growth response 1                                            | 1,6867         | 1,6865         | 1,6867         |
| NM_010118 | Egr2   | Early growth response 2                                            | 1,6987         | 1,6943         | 2,0167         |
| NM_018781 | Egr3   | Early growth response 3                                            | 1,1934         | 1,0074         | -1,4031        |
| NM_020596 | Egr4   | Early growth response 4                                            | -1,0005        | 1,6814         | 1,1867         |
| NM_010142 | Ephb2  | Eph receptor B2                                                    | -2,3807        | 1,1905         | -1,0014        |
| NM_010234 | Fos    | FBJ osteosarcoma oncogene                                          | 1,4119         | 1,9954         | 1,6853         |
| NM_176942 | Gabra5 | Gamma-aminobutyric acid (GABA) A receptor, subunit alpha 5         | -1,4032        | -1,4028        | 1,0058         |
| NM_010305 | Gnai1  | Guanine nucleotide binding protein (G protein), alpha inhibiting 1 | 1,0067         | -4,7996        | 1,0039         |
| NM_008165 | Gria1  | Glutamate receptor, ionotropic, AMPA1 (alpha 1)                    | -1,4062        | -1,4146        | -1,1881        |
| NM_013540 | Gria2  | Glutamate receptor, ionotropic, AMPA2 (alpha 2)                    | 1,0029         | 1,0083         | 1,0068         |
| NM_016886 | Gria3  | Glutamate receptor, ionotropic, AMPA3 (alpha 3)                    | 1,0062         | 1,1903         | -1,0015        |
| NM_019691 | Gria4  | Glutamate receptor, ionotropic, AMPA4 (alpha 4)                    | 1,1923         | 1,1917         | 1,191          |
| NM_008169 | Grin1  | Glutamate receptor, ionotropic, NMDA1 (zeta 1)                     | -1,0033        | 1,1926         | 1,001          |
| NM_008170 | Grin2a | Glutamate receptor, ionotropic, NMDA2A (epsilon 1)                 | 1,2            | 1,0066         | 1,0019         |
| NM_008171 | Grin2b | Glutamate receptor, ionotropic, NMDA2B (epsilon 2)                 | -1,0008        | -1,0003        | -1,0004        |
| NM_010350 | Grin2c | Glutamate receptor, ionotropic, NMDA2C (epsilon 3)                 | 1,4193         | 1,4166         | 1,0008         |
| NM_008172 | Grin2d | Glutamate receptor, ionotropic, NMDA2D (epsilon 4)                 | -2,0112        | 1,1935         | 1,1896         |
| NM_133442 | Grip1  | Glutamate receptor interacting protein 1                           | 1,6782         | 1,1913         | 1,0028         |

|              |          |                                                                                    |         |         |         |
|--------------|----------|------------------------------------------------------------------------------------|---------|---------|---------|
| NM_016976    | Grm1     | Glutamate receptor, metabotropic 1                                                 | 1,0073  | 1,1941  | 1,0018  |
| NM_001160353 | Grm2     | Glutamate receptor, metabotropic 2                                                 | -1,4047 | -1,0013 | 1,0016  |
| NM_181850    | Grm3     | Glutamate receptor, metabotropic 3                                                 | 2,0162  | 2,0129  | 1,0061  |
| NM_001013385 | Grm4     | Glutamate receptor, metabotropic 4                                                 | 1,7014  | 1,4298  | 1,1954  |
| NM_001081414 | Grm5     | Glutamate receptor, metabotropic 5                                                 | 1,716   | 1,1935  | 1,1985  |
| NM_177328    | Grm7     | Glutamate receptor, metabotropic 7                                                 | 1,1969  | 1,1922  | 1,4224  |
| NM_008174    | Grm8     | Glutamate receptor, metabotropic 8                                                 | 1,6834  | 1,1962  | 1,1902  |
| NM_152134    | Homer1   | Homer homolog 1 (Drosophila)                                                       | 1,6902  | 1,4205  | 1,1914  |
| NM_010512    | Igf1     | Insulin-like growth factor 1                                                       | 1,1887  | -1,0053 | -1,1871 |
| NM_008380    | Inhba    | Inhibin beta-A                                                                     | 1,1937  | -1,1875 | -1,4142 |
| NM_010591    | Jun      | Jun oncogene                                                                       | -1,186  | 1,0007  | 1,1837  |
| NM_008416    | Junb     | Jun-B oncogene                                                                     | 2,3935  | 1,1962  | 1,6848  |
| NM_010623    | Kif17    | Kinesin family member 17                                                           | 1,6835  | 2,3765  | 1,4144  |
| NM_013692    | Klf10    | Kruppel-like factor 10                                                             | 1,6921  | 1,6875  | -1,183  |
| NM_011949    | Mapk1    | Mitogen-activated protein kinase 1                                                 | 1,4207  | 1,689   | 1,1933  |
| NM_013599    | Mmp9     | Matrix metalloproteinase 9                                                         | 1,0051  | 1,4177  | 1,6825  |
| NM_010875    | Ncam1    | Neural cell adhesion molecule 1                                                    | 1,423   | 1,4223  | 1,1909  |
| NM_008689    | Nfkb1    | Nuclear factor of kappa light polypeptide gene enhancer in B-cells 1, p105         | 1,1966  | -1,1924 | 1,0042  |
| NM_010908    | Nfkbib   | Nuclear factor of kappa light polypeptide gene enhancer in B-cells inhibitor, beta | 1,223   | 1,6874  | 1,685   |
| NM_013609    | Ngf      | Nerve growth factor                                                                | -1,6741 | -2,3704 | -1,4121 |
| NM_033217    | Ngfr     | Nerve growth factor receptor (TNFR superfamily, member 16)                         | 1,6946  | 2,0117  | 1,4193  |
| NM_008712    | Nos1     | Nitric oxide synthase 1, neuronal                                                  | 1,4143  | 1,6863  | 1,6719  |
| NM_016789    | Nptx2    | Neuronal pentraxin 2                                                               | -1,4064 | -1,3956 | -1,3996 |
| NM_010444    | Nr4a1    | Nuclear receptor subfamily 4, group A, member 1                                    | 2,0023  | 1,9976  | 1,6847  |
| NM_008742    | Ntf3     | Neurotrophin 3                                                                     | 1,0049  | -1,4109 | 1,0034  |
| NM_198190    | Ntf5     | Neurotrophin 5                                                                     | 1,1714  | 1,3441  | 1,3863  |
| NM_008745    | Ntrk2    | Neurotrophic tyrosine kinase, receptor, type 2                                     | 1,4286  | 1,6832  | 1,0027  |
| NM_021543    | Pcdh8    | Protocadherin 8                                                                    | -1,674  | -1,6741 | -1,4016 |
| NM_008837    | Pick1    | Protein interacting with C kinase 1                                                | 1,4145  | 1,1869  | 1,0032  |
| NM_008842    | Pim1     | Proviral integration site 1                                                        | 1,1945  | 1,1902  | 1,69    |
| NM_008872    | Plat     | Plasminogen activator, tissue                                                      | 1,0031  | -1,1904 | 1,0022  |
| NM_021280    | Plcg1    | Phospholipase C, gamma 1                                                           | 1,4123  | 1,4082  | 1,6621  |
| NM_031868    | Ppp1ca   | Protein phosphatase 1, catalytic subunit, alpha isoform                            | 2,0131  | 1,6829  | 1,4151  |
| NM_013636    | Ppp1cc   | Protein phosphatase 1, catalytic subunit, gamma isoform                            | 1,4292  | 1,0101  | 1,0095  |
| NM_026731    | Ppp1r14a | Protein phosphatase 1, regulatory (inhibitor) subunit 14A                          | 1,4226  | 1,0003  | -1,0024 |

|           |        |                                                                        |         |         |         |
|-----------|--------|------------------------------------------------------------------------|---------|---------|---------|
| NM_019411 | Ppp2ca | Protein phosphatase 2 (formerly 2A), catalytic subunit, alpha isoform  | 1,1876  | 1,0009  | -1,0014 |
| NM_008913 | Ppp3ca | Protein phosphatase 3, catalytic subunit, alpha isoform                | 1,1934  | -1,1864 | 1,0007  |
| NM_011101 | Prkca  | Protein kinase C, alpha                                                | -1,1834 | -1,1842 | -1,1892 |
| NM_011102 | Prkcg  | Protein kinase C, gamma                                                | -1,1852 | 1,0021  | -1,1913 |
| NM_011160 | Prkg1  | Protein kinase, cGMP-dependent, type I                                 | 1,0024  | 1,19    | 1,4128  |
| NM_009001 | Rab3a  | RAB3A, member RAS oncogene family                                      | -1,1779 | 1,0025  | 1,0025  |
| NM_009045 | Rela   | V-rel reticuloendotheliosis viral oncogene homolog A (avian)           | 1,1951  | 1,0049  | 1,4172  |
| NM_011261 | Reln   | Reelin                                                                 | 1,4291  | 1,1961  | 1,1974  |
| NM_009061 | Rgs2   | Regulator of G-protein signaling 2                                     | 1,9974  | 1,6785  | 1,0021  |
| NM_053075 | Rheb   | Ras homolog enriched in brain                                          | 1,1974  | -1,1839 | 1,0046  |
| NM_019812 | Sirt1  | Sirtuin 1 (silent mating type information regulation 2, homolog) 1     | 1,0064  | -1,1858 | -1,1855 |
| NM_020493 | Srf    | Serum response factor                                                  | 1,0011  | 1,1931  | 1,0017  |
| NM_177340 | Synpo  | Synaptopodin                                                           | 1,0088  | 1,0024  | 1,0046  |
| NM_011593 | Timp1  | Tissue inhibitor of metalloproteinase 1                                | 1,2095  | 1,6688  | 1,6862  |
| NM_013693 | Tnf    | Tumor necrosis factor                                                  | 1,1946  | 1,6874  | 1,685   |
| NM_011739 | Ywhaq  | Tyrosine 3-monooxygenase/tryptophan 5-monooxygenase activation protein | 1,0003  | 1,0022  | -1,1893 |

**Blue:** statistically significant downregulated genes

**Red:** statistically significant upregulated genes

## Supplementary Table 2. PRIMERS

Primer sequences used for mRNA analyses.

| Gene                  | Primer sequence |                               |
|-----------------------|-----------------|-------------------------------|
| <i>Bdnf</i> exon I    | FW              | 5'-TGAGAGTTGAAGCTTTGCGG-3'    |
|                       | RV              | 5'-ATTGTGGCTTTGCTGTCCTG-3'    |
| <i>Bdnf</i> exon II   | FW              | 5'-TGGAAGAAACCGTCTAGAGC-3'    |
|                       | RV              | 5'-CTCGGTGTGAGCCGAACC-3'      |
| <i>Bdnf</i> exon III  | FW              | 5'-TATCATCCCTCCCCGAGAG-3'     |
|                       | RV              | 5'-CTCTTCGATCTAGAAAGGACC-3'   |
| <i>Bdnf</i> exon IV   | FW              | 5'-AGCATGAAATCTCCAGCCT-3'     |
|                       | RV              | 5'-CGGTCCCCAAGGTTCTAGAC-3'    |
| <i>Bdnf</i> exon V    | FW              | 5'-GTGTAGTTTCATTGTGTGTTTCG-3' |
|                       | RV              | 5'-GCAATGTGCTCTAGAGTAGG-3'    |
| <i>Bdnf</i> exon VI   | FW              | 5'-TGGCTGTGCGACGGTTC-3'       |
|                       | RV              | 5'-GTTGTCACGCTTCTGGTCC-3'     |
| <i>Bdnf</i> exon VII  | FW              | 5'-AAAGGGTCTGCGGAAGTCC-3'     |
|                       | RV              | 5'-CTCTTCCTGTTTCAGCATCC-3'    |
| <i>Bdnf</i> exon VIII | FW              | 5'-GTCGCTGCGCCTCAGTGG-3'      |
|                       | RV              | 5'-CACCAAGCTTTAAAACTGAGG-3'   |
| <i>Bdnf</i> exon IXa  | FW              | 5'-CAAAGCTGCTAAAGCGGGAGG-3'   |
|                       | RV              | 5'-GATCCACTCCAGCTGCAGG-3'     |
| <i>Bdnf</i> exon IX   | FW              | 5'-TGGCTGACACTTTTGAGC-3'      |
|                       | RV              | 5'-GTTTGCGGCATCCAGGT-3'       |
| <i>Gapdh</i>          | FW              | 5'-TCCATGACAACCTTTGGCATT-3'   |
|                       | RV              | 5'-GTTGCTGTTGAAGTCGCAGG-3'    |
| BDNF exon IX (ddPCR)  | FW              | 5'-GGCAGGTTTCGAGAGGTCTGA-3'   |
|                       | RV              | 5'-TCGATGACGTGCTCAAAGTG-3'    |
| Aldolase (ddPCR)      | FW              | 5'-CGCTGCCAGTATGTTACTGAGAA-3' |
|                       | RV              | 5'-TGGTCGCTCAGAGCCTTGT-3'     |

Primer sequences used for ChIP analyses.

| Gene             | Primer sequence |                             |
|------------------|-----------------|-----------------------------|
| BDNF promoter I  | FW              | 5'-TCGATTCACGCAGTTGTTCC-3'  |
|                  | RV              | 5'-GCACCAGCCGGCTACTGC-3'    |
| BDNF promoter IV | FW              | 5'-CATGCAATGCCCTGGAACG-3'   |
|                  | RV              | 5'-GAGAGCAGTCCTCTCCTCG-3'   |
| BDNF promoter IX | FW              | 5'-GAAGCTGAGCTCTCTGTGG-3'   |
|                  | RV              | 5'-GGTCTCATGAAGAACTTAAGG-3' |

Abbreviations: FW, forward; RV, reverse

**Supplementary Table 3. ANTIBODIES**

| Primary Antibody                                 | Host   | Catalogue reference   |
|--------------------------------------------------|--------|-----------------------|
| $\alpha$ -TrkB (80E3)                            | Rabbit | Cell Signaling #4603  |
| $\alpha$ -pTrkB Tyr <sup>816</sup>               | Rabbit | See Methods           |
| $\alpha$ -FoxO3a                                 | Rabbit | Cell Signaling #2497  |
| $\alpha$ -phospho FoxO3a Ser <sup>253</sup>      | Rabbit | Cell Signaling #9466  |
| $\alpha$ -Irs-1                                  | Rabbit | Cell Signaling #2382  |
| $\alpha$ -phospho Irs-1 Ser <sup>612</sup>       | Rabbit | Cell Signaling #2386  |
| $\alpha$ -beta Actin                             | Rabbit | Abcam ab8227          |
| $\alpha$ -Sirt1                                  | Rabbit | Millipore #07-131     |
| $\alpha$ -Sirt2 (D4S6J)                          | Rabbit | Cell Signaling #12672 |
| $\alpha$ -phospho Creb Ser <sup>133</sup>        | Rabbit | Cell Signaling #9198  |
| $\alpha$ -Creb                                   | Mouse  | ThermoFisher #MA1-083 |
| $\alpha$ -Hdac2                                  | Mouse  | Abcam ab12169         |
| $\alpha$ -Cbp                                    | Rabbit | Abcam ab2832          |
| $\alpha$ -Tri-Methyl-Histone H3 Lys <sup>4</sup> | Rabbit | Abcam ab8580          |
| $\alpha$ -Histone H3 (acetyl K9)                 | Rabbit | Abcam ab4441          |
| $\alpha$ -p66Shc                                 | Mouse  | BD Bioscience 610878  |
